# Supplementary material for: Optogenetic control of gene expression in the cyanobacterium Synechococcus sp. PCC 7002
Source: Front Bioeng Biotechnol. 2025 Jan 17;12:1529022. doi: 10.3389/fbioe.2024.1529022 (PMC11782128; doi:10.3389/fbioe.2024.1529022)
Supplement: Supplementary file 1 [file Table2.xlsx]

## Sheet: Sheet1
Primer Name	Sequence	Use
YF1v2 F1 F	tatggcttcattcagctccggttcccaac	Generation of pAQ1BB-Blue-v2
YF1v2 F1 R	gtaaaatcgttccttacttatataaatgaattaatctcctacttgactttatgagttg	Generation of pAQ1BB-Blue-v2
YF1v2 F2 F	tttatataagtaaggaacgattttacgtggcgagttttcagtcttttg	Generation of pAQ1BB-Blue-v2
YF1v2 F2 R	cggagctgaatgaagccataccaaacgac	Generation of pAQ1BB-Blue-v2
CcaS F	tttctgcagttacataagcttgggcatcacgcatggtatgg	Generation of pAQ1BB-CcaSR-GFP
CcaS R	aaactgcagaagtaacgtacgctagtatttctcctctttagataaagttag	Generation of pAQ1BB-CcaSR-GFP
CcaR F	ttcaataagctttactcaggagagcgttcacc	Generation of pAQ1BB-CcaSR-GFP
CcaR R	aagtaacgtacgctagtatttctcctctttagataaagttag	Generation of pAQ1BB-CcaSR-GFP
172-F1 F	aaagaggagaaatactagcg	Generation of pUC-172-GFP
172-F1 R	gtatttggtatctgcgctc	Generation of pUC-172-GFP
172-F2 F	agagcgcagataccaaatactgttcttctagtgtagcc	Generation of pUC-172-GFP
172-F2 R	cgctagtatttctcctctttttaaaaatgcgatcctaacaaag	Generation of pUC-172-GFP
172-10 BB F	acttggttgagtactcac	Generation of pUC-172-10-GFP
172-10 BB R	ggcaagccattagtcaatg	Generation of pUC-172-10-GFP
172-10 F1 F	ccattgactaatggcttgccgcaccctatctaattcag	Generation of pUC-172-10-GFP
172-10 F1 R	tctcctctttttaaaaatgcgattataacaaagtaaaattg	Generation of pUC-172-10-GFP
172-10 F2 F	gcatttttaaaaagaggagaaatactagcg	Generation of pUC-172-10-GFP
172-10 F2 R	tggtgagtactcaaccaagtcattctgagaatagtgtatgc	Generation of pUC-172-10-GFP
172-35 BB F	tctcagaatgacttggttgagtactcac	Generation of pUC-172-35-GFP
172-35 BB R	gatagggtgcggcaagccattagtcaatg	Generation of pUC-172-35-GFP
172-35 F1 F	atggcttgccgcaccctatctaattcag	Generation of pUC-172-35-GFP
172-35 F1 R	gatgtctggggggagaaaatcgtaaagaaatc	Generation of pUC-172-35-GFP
172-35 F2 F	attttctccccccagacatcaattttactttgttaggatcg	Generation of pUC-172-35-GFP
172-35 F2 R	tcaaccaagtcattctgagaatagtgtatgc	Generation of pUC-172-35-GFP
35-10 BB F	tctcagaatgacttggttgagtactcac	Generation of pUC-172-35-10-GFP
35-10 BB R	gatagggtgcggcaagccattagtcaatg	Generation of pUC-172-35-10-GFP
35-10 F1 F	atggcttgccgcaccctatctaattcag	Generation of pUC-172-35-10-GFP
35-10 F1 R	gatgtctggggggagaaaatcgtaaagaaatc	Generation of pUC-172-35-10-GFP
35-10 F2 F	attttctccccccagacatcaattttactttgttataatcgc	Generation of pUC-172-35-10-GFP
35-10 F2 R	tcaaccaagtcattctgagaatagtgtatgc	Generation of pUC-172-35-10-GFP
CcaS SDM F1	agacgtacggccattgggatatatcaacggtg	Generation of pUC-172-GFP, pUC-172-10-GFP, pUC-172-35-GFP and pUC-172-35-10-GFP
CcaS SDM R1	agacctagggtacgctagtatttctcctcttt	Generation of pUC-172-GFP, pUC-172-10-GFP, pUC-172-35-GFP and pUC-172-35-10-GFP
GFPq F	agcgttcaactagcagacca	qRT-PCR - GFP
GFPq R	cgaaagggcagattgtgtgg	qRT-PCR - GFP
A1356 F	tccacacctttatcgccacc	qRT-PCR - A1356
A1356 R	caacacatccttgcggcttt	qRT-PCR - A1356
